# Supplementary material
Source: publisher figshare collection journal article supplement (https://acs.figshare.com/ndownloader/files/4781779)
Supplement: Supplementary file 1 [file 4781779]

 
data_shelxl 
 
_audit_creation_method            SHELXL-97 
_chemical_name_systematic 
; 
 ? 
; 
_chemical_name_common             ? 
_chemical_melting_point           ? 
_chemical_formula_moiety          ? 
_chemical_formula_sum 
 'C23  I1 O3 Si1' 
_chemical_formula_weight          479     
 
loop_ 
 _atom_type_symbol 
 _atom_type_description 
 _atom_type_scat_dispersion_real 
 _atom_type_scat_dispersion_imag 
 _atom_type_scat_source 
 'C'  'C'   0.0033   0.0016 
 'International Tables Vol C Tables 4.2.6.8 and 6.1.1.4' 
 'O'  'O'   0.0106   0.0060 
 'International Tables Vol C Tables 4.2.6.8 and 6.1.1.4' 
 'H'  'H'   0.0000   0.0000 
 'International Tables Vol C Tables 4.2.6.8 and 6.1.1.4' 
 'I'  'I'  -0.4742   1.8119 
 'International Tables Vol C Tables 4.2.6.8 and 6.1.1.4' 
 'Si'  'Si'   0.0817   0.0704 
 'International Tables Vol C Tables 4.2.6.8 and 6.1.1.4' 
 
_symmetry_cell_setting            'monoclinic'
_symmetry_space_group_name_H-M    P21/n
 
loop_ 
 _symmetry_equiv_pos_as_xyz 
 'x, y, z' 
 '-x+1/2, y+1/2, -z+1/2' 
 '-x, -y, -z' 
 'x-1/2, -y-1/2, z-1/2' 
 
_cell_length_a                    12.6650(3) 
_cell_length_b                    20.5240(5) 
_cell_length_c                    19.9440(5) 
_cell_angle_alpha                 90.00 
_cell_angle_beta                  96.16 
_cell_angle_gamma                 90.00 
_cell_volume                      5154.2(2) 
_cell_formula_units_Z             8 
_cell_measurement_temperature     293(2) 
_cell_measurement_reflns_used     ? 
_cell_measurement_theta_min       ? 
_cell_measurement_theta_max       ? 
 
_exptl_crystal_description        'needles'
_exptl_crystal_colour             'colorless'
_exptl_crystal_size_max           0.6
_exptl_crystal_size_mid           0.2
_exptl_crystal_size_min           0.1
_exptl_crystal_density_meas       'not measured'
_exptl_crystal_density_diffrn     1.298 
_exptl_crystal_density_method     'not measured' 
_exptl_crystal_F_000              2072 
_exptl_absorpt_coefficient_mu     2.6   
_exptl_absorpt_correction_type    'none'
_exptl_absorpt_correction_T_min   ? 
_exptl_absorpt_correction_T_max   ? 
_exptl_absorpt_process_details    ? 
 
_exptl_special_details 
; 
 ? 
; 
 
_diffrn_ambient_temperature       293(2) 
_diffrn_radiation_wavelength      0.71073 
_diffrn_radiation_type            MoK\a 
_diffrn_radiation_source          'fine-focus sealed tube' 
_diffrn_radiation_monochromator   graphite 
_diffrn_measurement_device_type   'Kappa CCD'
_diffrn_measurement_method        'Collect'
_diffrn_detector_area_resol_mean  ? 
_diffrn_standards_number          ? 
_diffrn_standards_interval_count  ? 
_diffrn_standards_interval_time   ? 
_diffrn_standards_decay_%         ? 
_diffrn_reflns_number             4005 
_diffrn_reflns_av_R_equivalents   0.0000 
_diffrn_reflns_av_sigmaI/netI     0.1942 
_diffrn_reflns_limit_h_min        0 
_diffrn_reflns_limit_h_max        11 
_diffrn_reflns_limit_k_min        0 
_diffrn_reflns_limit_k_max        18 
_diffrn_reflns_limit_l_min        -18 
_diffrn_reflns_limit_l_max        18 
_diffrn_reflns_theta_min          2.01 
_diffrn_reflns_theta_max          18.85 
_reflns_number_total              4005 
_reflns_number_gt                 1806 
_reflns_threshold_expression      >2sigma(I) 
 
_computing_data_collection        ? 
_computing_cell_refinement        ? 
_computing_data_reduction         ? 
_computing_structure_solution     'SHELXS-97 (Sheldrick, 1990)' 
_computing_structure_refinement   'SHELXL-97 (Sheldrick, 1997)' 
_computing_molecular_graphics     ? 
_computing_publication_material   ? 
 
_refine_special_details 
; 
 Refinement of F^2^ against ALL reflections.  The weighted R-factor wR and 
 goodness of fit S are based on F^2^, conventional R-factors R are based 
 on F, with F set to zero for negative F^2^. The threshold expression of 
 F^2^ > 2sigma(F^2^) is used only for calculating R-factors(gt) etc. and is 
 not relevant to the choice of reflections for refinement.  R-factors based 
 on F^2^ are statistically about twice as large as those based on F, and R- 
 factors based on ALL data will be even larger. 
; 
 
_refine_ls_structure_factor_coef  Fsqd  
_refine_ls_matrix_type            full 
_refine_ls_weighting_scheme       calc  
_refine_ls_weighting_details 
 'calc w=1/[\s^2^(Fo^2^)+(0.1132P)^2^+0.0000P] where P=(Fo^2^+2Fc^2^)/3' 
_atom_sites_solution_primary      direct 
_atom_sites_solution_secondary    difmap 
_atom_sites_solution_hydrogens    geom 
_refine_ls_hydrogen_treatment     none  
_refine_ls_extinction_method      none 
_refine_ls_extinction_coef        ? 
_refine_ls_number_reflns          4005 
_refine_ls_number_parameters      505 
_refine_ls_number_restraints      0 
_refine_ls_R_factor_all           0.1879 
_refine_ls_R_factor_gt            0.0834 
_refine_ls_wR_factor_ref          0.2367 
_refine_ls_wR_factor_gt           0.1834 
_refine_ls_goodness_of_fit_ref    0.937 
_refine_ls_restrained_S_all       0.937 
_refine_ls_shift/su_max           0.003 
_refine_ls_shift/su_mean          0.000 
 
loop_ 
 _atom_site_label 
 _atom_site_type_symbol 
 _atom_site_fract_x 
 _atom_site_fract_y 
 _atom_site_fract_z 
 _atom_site_U_iso_or_equiv 
 _atom_site_adp_type 
 _atom_site_occupancy 
 _atom_site_symmetry_multiplicity 
 _atom_site_calc_flag 
 _atom_site_refinement_flags 
 _atom_site_disorder_assembly 
 _atom_site_disorder_group 
I001 I 0.90279(11) 0.88510(9) 0.15060(8) 0.1070(8) Uani 1 1 d . . . 
C019 C 1.0580(13) 0.8510(10) 0.1831(10) 0.073(7) Uani 1 1 d . . . 
C024 C 1.1254(15) 0.8373(10) 0.1396(11) 0.075(7) Uani 1 1 d . . . 
Q61 C 1.1100(16) 0.8419(14) 0.0628(10) 0.120(10) Uani 1 1 d . . . 
C020 C 1.2355(15) 0.8185(10) 0.1746(9) 0.068(6) Uani 1 1 d . . . 
Q6 C 1.2781(14) 0.7569(12) 0.1444(9) 0.066(6) Uani 1 1 d . . . 
C011 O 1.2079(9) 0.7015(8) 0.1537(6) 0.077(4) Uani 1 1 d . . . 
C065 C 1.2583(17) 0.6488(12) 0.1911(12) 0.085(7) Uani 1 1 d . . . 
C041 C 1.3789(14) 0.6625(12) 0.1859(10) 0.068(6) Uani 1 1 d . . . 
C040 C 1.3886(17) 0.7379(12) 0.1794(10) 0.076(6) Uani 1 1 d . . . 
C034 C 1.4751(15) 0.7453(14) 0.1317(9) 0.068(7) Uani 1 1 d . . . 
C025 C 1.4819(14) 0.6830(12) 0.0879(10) 0.077(7) Uani 1 1 d . . . 
C035 C 1.4038(16) 0.6346(11) 0.1162(10) 0.084(7) Uani 1 1 d . . . 
C033 C 1.5347(16) 0.7994(17) 0.1296(12) 0.098(9) Uani 1 1 d . . . 
C039 C 1.6159(15) 0.8031(12) 0.0782(12) 0.115(9) Uani 1 1 d . . . 
C046 C 1.5250(18) 0.8579(12) 0.1755(13) 0.103(8) Uani 1 1 d . . . 
C009 O 1.2355(8) 0.6624(6) 0.2594(7) 0.074(4) Uani 1 1 d . . . 
C007 O 1.4362(8) 0.6488(7) 0.3052(7) 0.087(4) Uani 1 1 d . . . 
C027 C 1.4580(16) 0.6266(10) 0.2366(9) 0.078(7) Uani 1 1 d . . . 
Si03 Si 1.3145(4) 0.6472(3) 0.3292(3) 0.076(2) Uani 1 1 d . . . 
C038 C 1.2810(17) 0.5602(12) 0.3571(13) 0.102(8) Uani 1 1 d . . . 
C021 C 1.178(2) 0.5593(14) 0.3948(15) 0.164(13) Uani 1 1 d . . . 
C029 C 1.374(2) 0.5367(13) 0.4125(12) 0.144(11) Uani 1 1 d . . . 
C045 C 1.267(3) 0.5161(16) 0.2935(15) 0.203(17) Uani 1 1 d . . . 
C047 C 1.3041(17) 0.7167(12) 0.3898(9) 0.084(7) Uani 1 1 d . . . 
C042 C 1.3542(18) 0.7821(14) 0.3643(12) 0.119(9) Uani 1 1 d . . . 
C049 C 1.357(2) 0.6983(13) 0.4596(10) 0.136(10) Uani 1 1 d . . . 
C052 C 1.1809(16) 0.7297(12) 0.3961(12) 0.122(9) Uani 1 1 d . . . 
I002 I 0.40701(12) 0.42396(10) 0.12464(9) 0.1200(9) Uani 1 1 d . . . 
C044 C 0.5575(14) 0.4571(11) 0.1635(12) 0.092(8) Uani 1 1 d . . . 
C062 C 0.6324(19) 0.4644(11) 0.1244(12) 0.088(7) Uani 1 1 d . . . 
Q9 C 0.6303(16) 0.4505(14) 0.0473(12) 0.123(10) Uani 1 1 d . . . 
C015 C 0.7452(16) 0.4820(11) 0.1580(10) 0.084(7) Uani 1 1 d . . . 
C012 C 0.7812(14) 0.5478(12) 0.1320(10) 0.070(6) Uani 1 1 d . . . 
C005 O 0.7085(10) 0.5992(8) 0.1504(7) 0.082(4) Uani 1 1 d . . . 
C028 C 0.7595(16) 0.6473(11) 0.1925(11) 0.067(6) Uani 1 1 d . . . 
C016 C 0.8795(14) 0.6428(12) 0.1796(10) 0.066(6) Uani 1 1 d . . . 
C031 C 0.8912(16) 0.5686(11) 0.1689(9) 0.075(6) Uani 1 1 d . . . 
C023 C 0.9808(16) 0.5655(15) 0.1195(10) 0.080(8) Uani 1 1 d . . . 
C043 C 0.9786(16) 0.6316(12) 0.0803(11) 0.086(7) Uani 1 1 d . . . 
C037 C 0.8939(15) 0.6770(11) 0.1123(10) 0.080(7) Uani 1 1 d . . . 
C053 C 1.0428(16) 0.5119(17) 0.1156(13) 0.107(11) Uani 1 1 d . . . 
C054 C 1.1228(15) 0.5199(14) 0.0613(12) 0.126(10) Uani 1 1 d . . . 
O060 C 1.044(2) 0.4508(15) 0.1578(15) 0.126(11) Uani 1 1 d . . . 
C006 O 0.7379(8) 0.6338(7) 0.2593(7) 0.079(4) Uani 1 1 d . . . 
C008 O 0.9378(8) 0.6523(6) 0.3011(7) 0.076(4) Uani 1 1 d . . . 
C017 C 0.9588(16) 0.6747(11) 0.2338(10) 0.084(7) Uani 1 1 d . . . 
Si04 Si 0.8172(4) 0.6517(3) 0.3270(3) 0.0724(19) Uani 1 1 d . . . 
C026 C 0.7796(16) 0.7345(11) 0.3547(11) 0.080(7) Uani 1 1 d . . . 
C022 C 0.876(2) 0.7680(16) 0.4014(18) 0.219(18) Uani 1 1 d . . . 
C050 C 0.678(2) 0.7407(12) 0.3901(14) 0.153(12) Uani 1 1 d . . . 
C058 C 0.762(3) 0.7840(13) 0.2948(14) 0.191(16) Uani 1 1 d . . . 
Q1 C 0.6910(15) 0.5688(12) 0.4043(10) 0.105(9) Uani 1 1 d . . . 
Q2 C 0.803(2) 0.5835(12) 0.3892(10) 0.100(8) Uani 1 1 d . . . 
Q3 C 0.8488(18) 0.5177(13) 0.3581(11) 0.113(8) Uani 1 1 d . . . 
Q4 C 0.8771(17) 0.5961(13) 0.4592(10) 0.118(9) Uani 1 1 d . . . 
 
loop_ 
 _atom_site_aniso_label 
 _atom_site_aniso_U_11 
 _atom_site_aniso_U_22 
 _atom_site_aniso_U_33 
 _atom_site_aniso_U_23 
 _atom_site_aniso_U_13 
 _atom_site_aniso_U_12 
I001 0.0793(11) 0.1090(17) 0.1310(15) -0.0071(11) 0.0030(9) 0.0172(10) 
C019 0.038(12) 0.078(19) 0.100(17) -0.001(13) -0.005(11) 0.016(11) 
C024 0.049(14) 0.072(19) 0.10(2) 0.004(14) 0.003(14) 0.004(12) 
Q61 0.119(18) 0.19(3) 0.047(15) 0.035(16) -0.002(13) 0.062(18) 
C020 0.077(15) 0.046(18) 0.076(15) -0.015(12) -0.011(11) 0.016(13) 
Q6 0.036(13) 0.06(2) 0.098(16) 0.015(14) -0.017(11) 0.004(13) 
C011 0.066(9) 0.079(13) 0.081(10) 0.002(9) -0.013(8) -0.014(10) 
C065 0.091(19) 0.09(2) 0.072(18) 0.028(15) 0.006(14) 0.029(16) 
C041 0.057(15) 0.09(2) 0.055(15) -0.012(14) 0.001(11) -0.002(13) 
C040 0.094(19) 0.05(2) 0.084(16) 0.006(13) -0.007(14) 0.008(14) 
C034 0.045(14) 0.11(3) 0.043(14) 0.028(16) -0.007(11) -0.003(15) 
C025 0.077(15) 0.07(2) 0.082(16) -0.013(16) 0.013(12) 0.017(14) 
C035 0.104(17) 0.09(2) 0.067(15) -0.005(14) 0.027(13) -0.023(14) 
C033 0.053(15) 0.13(3) 0.11(2) 0.06(2) 0.028(14) -0.011(18) 
C039 0.078(15) 0.11(2) 0.17(2) 0.023(18) 0.052(15) -0.026(15) 
C046 0.109(19) 0.05(2) 0.15(2) -0.003(17) 0.011(15) 0.000(15) 
C009 0.050(8) 0.074(12) 0.096(11) 0.012(9) 0.003(8) -0.012(7) 
C007 0.060(9) 0.100(13) 0.096(11) 0.020(9) -0.007(8) 0.002(8) 
C027 0.103(15) 0.10(2) 0.029(12) 0.009(13) 0.004(12) 0.025(14) 
Si03 0.069(4) 0.074(6) 0.082(5) 0.007(4) -0.004(4) 0.007(4) 
C038 0.100(18) 0.07(2) 0.14(2) 0.055(18) 0.029(16) 0.008(15) 
C021 0.13(2) 0.13(3) 0.25(3) 0.08(2) 0.10(2) 0.017(19) 
C029 0.15(2) 0.12(3) 0.14(2) 0.053(19) -0.057(18) 0.01(2) 
C045 0.35(5) 0.12(3) 0.14(3) -0.06(2) 0.05(3) -0.09(3) 
C047 0.114(18) 0.09(2) 0.044(15) -0.025(14) 0.002(12) 0.020(16) 
C042 0.14(2) 0.09(3) 0.12(2) 0.013(17) -0.004(15) -0.031(18) 
C049 0.22(3) 0.13(3) 0.044(15) 0.006(15) -0.025(16) 0.03(2) 
C052 0.080(17) 0.11(2) 0.18(2) -0.010(18) 0.029(15) 0.021(15) 
I002 0.0863(12) 0.1118(19) 0.1582(17) 0.0177(13) -0.0041(10) -0.0182(11) 
C044 0.030(12) 0.11(2) 0.13(2) -0.009(16) 0.000(12) -0.033(13) 
C062 0.10(2) 0.07(2) 0.10(2) 0.002(15) -0.014(16) 0.011(16) 
Q9 0.098(17) 0.18(3) 0.087(19) -0.001(18) 0.001(14) -0.047(17) 
C015 0.096(17) 0.054(19) 0.099(17) 0.000(14) 0.004(13) -0.057(14) 
C012 0.036(12) 0.06(2) 0.106(17) -0.026(14) -0.022(11) 0.002(13) 
C005 0.077(10) 0.084(14) 0.079(11) -0.005(9) -0.013(8) 0.005(10) 
C028 0.085(17) 0.055(18) 0.058(16) -0.024(14) -0.005(13) 0.002(13) 
C016 0.064(15) 0.07(2) 0.069(17) -0.001(14) 0.020(12) 0.000(12) 
C031 0.103(18) 0.033(18) 0.084(16) -0.017(13) -0.010(14) -0.003(14) 
C023 0.053(14) 0.12(3) 0.074(17) -0.047(17) 0.031(12) -0.017(16) 
C043 0.090(17) 0.07(2) 0.099(18) 0.010(16) 0.010(13) -0.026(14) 
C037 0.105(17) 0.069(19) 0.071(16) 0.001(14) 0.025(13) 0.004(14) 
C053 0.031(14) 0.15(3) 0.14(2) -0.10(2) -0.001(15) 0.011(18) 
C054 0.067(15) 0.17(3) 0.14(2) -0.045(19) 0.029(15) 0.019(16) 
O060 0.12(2) 0.08(3) 0.17(3) 0.00(2) -0.004(17) 0.009(19) 
C006 0.058(8) 0.106(14) 0.073(10) -0.015(9) 0.003(8) -0.012(8) 
C008 0.049(8) 0.074(12) 0.100(11) -0.017(9) -0.012(7) -0.004(7) 
C017 0.105(16) 0.11(2) 0.033(13) 0.002(13) 0.006(12) -0.032(15) 
Si04 0.061(4) 0.072(6) 0.083(5) -0.003(4) 0.002(3) -0.004(3) 
C026 0.085(16) 0.047(18) 0.108(18) -0.025(15) 0.006(13) 0.012(13) 
C022 0.14(3) 0.13(3) 0.35(4) -0.13(3) -0.10(3) 0.03(2) 
C050 0.18(3) 0.07(2) 0.24(3) -0.04(2) 0.14(2) -0.003(18) 
C058 0.38(5) 0.04(2) 0.15(3) 0.024(19) 0.03(3) 0.10(3) 
Q1 0.072(15) 0.13(2) 0.120(19) 0.017(16) 0.056(14) -0.007(15) 
Q2 0.16(2) 0.08(2) 0.057(16) 0.021(14) -0.005(15) -0.002(18) 
Q3 0.14(2) 0.09(2) 0.115(19) 0.010(17) 0.001(15) 0.031(17) 
Q4 0.118(18) 0.17(3) 0.055(15) -0.006(15) -0.027(13) -0.018(17) 
 
_geom_special_details 
; 
 All esds (except the esd in the dihedral angle between two l.s. planes) 
 are estimated using the full covariance matrix.  The cell esds are taken 
 into account individually in the estimation of esds in distances, angles 
 and torsion angles; correlations between esds in cell parameters are only 
 used when they are defined by crystal symmetry.  An approximate (isotropic) 
 treatment of cell esds is used for estimating esds involving l.s. planes. 
; 
 
loop_ 
 _geom_bond_atom_site_label_1 
 _geom_bond_atom_site_label_2 
 _geom_bond_distance 
 _geom_bond_site_symmetry_2 
 _geom_bond_publ_flag 
I001 C019 2.122(17) . ? 
C019 C024 1.31(2) . ? 
C024 C020 1.54(2) . ? 
C024 Q61 1.53(2) . ? 
C020 Q6 1.52(2) . ? 
Q6 C011 1.47(2) . ? 
Q6 C040 1.55(2) . ? 
C011 C065 1.43(2) . ? 
C065 C009 1.45(2) . ? 
C065 C041 1.57(2) . ? 
C041 C027 1.53(2) . ? 
C041 C040 1.56(3) . ? 
C041 C035 1.57(2) . ? 
C040 C034 1.53(2) . ? 
C034 C033 1.35(3) . ? 
C034 C025 1.56(3) . ? 
C025 C035 1.55(3) . ? 
C033 C046 1.52(3) . ? 
C033 C039 1.53(3) . ? 
C009 Si03 1.654(13) . ? 
C007 C027 1.494(19) . ? 
C007 Si03 1.663(12) . ? 
Si03 C047 1.88(2) . ? 
Si03 C038 1.93(2) . ? 
C038 C045 1.55(3) . ? 
C038 C021 1.57(3) . ? 
C038 C029 1.60(3) . ? 
C047 C049 1.53(2) . ? 
C047 C052 1.60(2) . ? 
C047 C042 1.59(3) . ? 
I002 C044 2.093(17) . ? 
C044 C062 1.30(2) . ? 
C062 C015 1.55(3) . ? 
C062 Q9 1.56(3) . ? 
C015 C012 1.53(2) . ? 
C012 C005 1.47(2) . ? 
C012 C031 1.56(2) . ? 
C005 C028 1.41(2) . ? 
C028 C006 1.42(2) . ? 
C028 C016 1.57(2) . ? 
C016 C017 1.54(2) . ? 
C016 C031 1.55(2) . ? 
C016 C037 1.54(2) . ? 
C031 C023 1.58(2) . ? 
C023 C053 1.36(3) . ? 
C023 C043 1.57(3) . ? 
C043 C037 1.61(3) . ? 
C053 O060 1.51(3) . ? 
C053 C054 1.57(3) . ? 
C006 Si04 1.636(13) . ? 
C008 C017 1.470(18) . ? 
C008 Si04 1.664(12) . ? 
Si04 C026 1.87(2) . ? 
Si04 Q2 1.89(2) . ? 
C026 C058 1.57(3) . ? 
C026 C050 1.54(3) . ? 
C026 C022 1.61(3) . ? 
Q1 Q2 1.51(3) . ? 
Q2 Q3 1.62(3) . ? 
Q2 Q4 1.62(3) . ? 
 
loop_ 
 _geom_angle_atom_site_label_1 
 _geom_angle_atom_site_label_2 
 _geom_angle_atom_site_label_3 
 _geom_angle 
 _geom_angle_site_symmetry_1 
 _geom_angle_site_symmetry_3 
 _geom_angle_publ_flag 
C024 C019 I001 121.1(15) . . ? 
C019 C024 C020 112.1(19) . . ? 
C019 C024 Q61 128.9(19) . . ? 
C020 C024 Q61 118.9(17) . . ? 
Q6 C020 C024 111.7(15) . . ? 
C020 Q6 C011 110.4(15) . . ? 
C020 Q6 C040 111.9(17) . . ? 
C011 Q6 C040 106.2(16) . . ? 
C065 C011 Q6 114.3(14) . . ? 
C011 C065 C009 102.8(17) . . ? 
C011 C065 C041 102.3(17) . . ? 
C009 C065 C041 108.7(16) . . ? 
C027 C041 C040 118.7(17) . . ? 
C027 C041 C065 116.2(19) . . ? 
C040 C041 C065 105.7(18) . . ? 
C027 C041 C035 103.3(16) . . ? 
C040 C041 C035 105.3(16) . . ? 
C065 C041 C035 106.5(16) . . ? 
C041 C040 Q6 102.3(17) . . ? 
C041 C040 C034 102.5(18) . . ? 
Q6 C040 C034 111.6(16) . . ? 
C033 C034 C025 127(2) . . ? 
C033 C034 C040 123(2) . . ? 
C025 C034 C040 111(2) . . ? 
C034 C025 C035 104.2(17) . . ? 
C025 C035 C041 106.6(17) . . ? 
C034 C033 C046 123(2) . . ? 
C034 C033 C039 119(3) . . ? 
C046 C033 C039 118(2) . . ? 
C065 C009 Si03 126.2(12) . . ? 
C027 C007 Si03 121.7(11) . . ? 
C007 C027 C041 106.6(15) . . ? 
C007 Si03 C009 104.5(7) . . ? 
C007 Si03 C047 107.5(9) . . ? 
C009 Si03 C047 108.6(9) . . ? 
C007 Si03 C038 109.9(9) . . ? 
C009 Si03 C038 106.5(9) . . ? 
C047 Si03 C038 118.9(11) . . ? 
C045 C038 C021 111(2) . . ? 
C045 C038 C029 113(2) . . ? 
C021 C038 C029 105(2) . . ? 
C045 C038 Si03 108.3(17) . . ? 
C021 C038 Si03 111.5(17) . . ? 
C029 C038 Si03 107.9(16) . . ? 
C049 C047 C052 108.0(18) . . ? 
C049 C047 C042 110.4(19) . . ? 
C052 C047 C042 108.0(19) . . ? 
C049 C047 Si03 110.1(16) . . ? 
C052 C047 Si03 108.2(15) . . ? 
C042 C047 Si03 112.1(15) . . ? 
C062 C044 I002 120.6(18) . . ? 
C044 C062 C015 118(2) . . ? 
C044 C062 Q9 129(2) . . ? 
C015 C062 Q9 112.6(19) . . ? 
C012 C015 C062 110.7(17) . . ? 
C005 C012 C015 109.3(16) . . ? 
C005 C012 C031 103.6(15) . . ? 
C015 C012 C031 111.3(17) . . ? 
C028 C005 C012 113.1(14) . . ? 
C005 C028 C006 107.6(17) . . ? 
C005 C028 C016 104.6(16) . . ? 
C006 C028 C016 115.4(16) . . ? 
C017 C016 C031 116.8(17) . . ? 
C017 C016 C037 106.7(17) . . ? 
C031 C016 C037 107.9(16) . . ? 
C017 C016 C028 115.4(17) . . ? 
C031 C016 C028 100.9(16) . . ? 
C037 C016 C028 108.7(17) . . ? 
C012 C031 C016 103.9(16) . . ? 
C012 C031 C023 111.0(15) . . ? 
C016 C031 C023 102.1(17) . . ? 
C053 C023 C043 131(2) . . ? 
C053 C023 C031 122(2) . . ? 
C043 C023 C031 108(2) . . ? 
C023 C043 C037 106.3(17) . . ? 
C016 C037 C043 103.2(16) . . ? 
C023 C053 O060 128(2) . . ? 
C023 C053 C054 112(3) . . ? 
O060 C053 C054 120(2) . . ? 
C028 C006 Si04 124.7(12) . . ? 
C017 C008 Si04 123.3(11) . . ? 
C008 C017 C016 109.8(15) . . ? 
C006 Si04 C008 104.3(7) . . ? 
C006 Si04 C026 107.1(8) . . ? 
C008 Si04 C026 110.9(9) . . ? 
C006 Si04 Q2 106.4(9) . . ? 
C008 Si04 Q2 111.5(10) . . ? 
C026 Si04 Q2 115.7(11) . . ? 
C058 C026 C050 104(2) . . ? 
C058 C026 C022 102(2) . . ? 
C050 C026 C022 109(2) . . ? 
C058 C026 Si04 112.7(15) . . ? 
C050 C026 Si04 117.6(16) . . ? 
C022 C026 Si04 110.9(15) . . ? 
Q1 Q2 Q3 107(2) . . ? 
Q1 Q2 Q4 109.4(18) . . ? 
Q3 Q2 Q4 105.3(19) . . ? 
Q1 Q2 Si04 116.0(17) . . ? 
Q3 Q2 Si04 107.5(15) . . ? 
Q4 Q2 Si04 111.0(16) . . ? 
 
_diffrn_measured_fraction_theta_max    0.985 
_diffrn_reflns_theta_full              18.85 
_diffrn_measured_fraction_theta_full   0.985 
_refine_diff_density_max    0.399 
_refine_diff_density_min   -0.570 
_refine_diff_density_rms    0.103 
